# Supplementary material
Source: Springer Nature journal article supplement (https://www.springermedizin.de/resource/supplementary/12891_2013_2051_MOESM2_ESM.pdf/9510172)

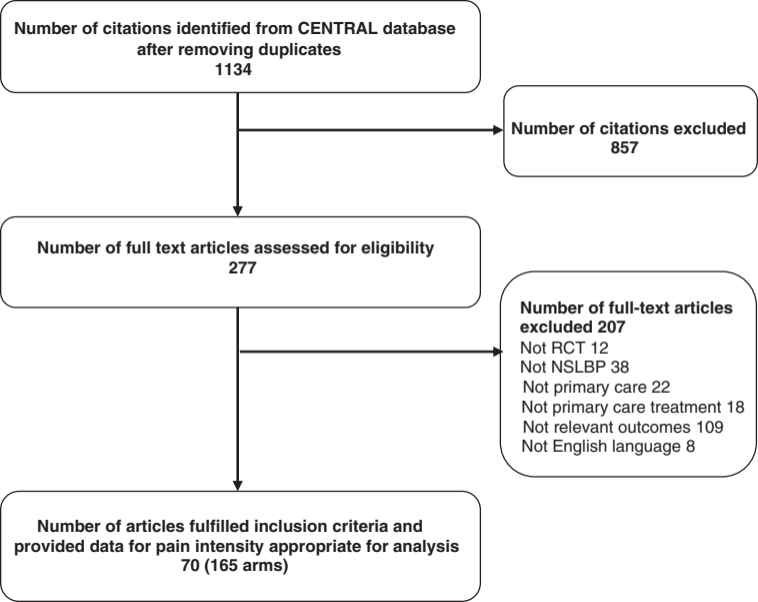

Supplement: MOESM2 [file 9510172]
